# Supplementary material for: A channel selection rule for YASS
Source: Springer Nature journal article supplement (doi:10.1007/s11432-014-5106-8), 2014-06-26
Supplement: 11432_2014_5106_MOESM1_ESM.pdf [file 11432_2014_5106_MOESM1_ESM.pdf]

中文题目: YASS方法的信道选择准则

关键词: 隐写, 隐写分析, YASS, 信道选择, 直流分量, 嵌入失真

创新点: 秘密信息的嵌入会给载体图像带来失真, 失真越大, 隐写算法越不安全. 本文的信道选择准则致力于最小化YASS嵌入框架带来的失真. 首先, 计算每一个量化的DCT分量上的单位修改带来的失真, 失真小的DCT分量被选择的优先级高. 该信道选择准则最小化了对YASS嵌入过程的中间空域图像带来的失真, 同时也最小化了对最终JPEG图像带来的失真. 实验结果表明, 该信道选择准则提高了原始YASS嵌入框架的安全性. 该信道选择准则还能与针对YASS框架的其它改进方法结合, 进一步提高框架的整体性能.
